# Supplementary material for: The extra cost of comorbidity: multiple illnesses and the economic burden of non-communicable diseases
Source: BMC Med. 2017 Dec 8;15:216. doi: 10.1186/s12916-017-0978-2 (PMC5723100; doi:10.1186/s12916-017-0978-2)
Supplement: Additional file 1: — Estimating the cost of chronic diseases in the presence of a comorbidity. (PDF 354 kb) [file 12916_2017_978_MOESM1_ESM.pdf]

### Additional file 1. Estimating the cost of chronic diseases in the presence of a comorbidity

Reminder (equation 1). In each stratum (combination of age categories and gender), the increase in healthcare expenditure attributable to each disease was calculated by subtracting average predicted expenditure for sick people in each category, from average predicted expenditure for the individuals with the other disease variables set to 0 (or 1 in case of comorbidity for a given other disease). For example, in given strata  $i$ , the cost associated with chronic disease  $d_j$  (with no other comorbidity) is estimated as follows:

$$\widehat{cost}_{id_j} = \left[ \hat{c}_i | d_j=1, d_{k_{k \neq j}}=0, d_{kl_{k,l \neq j}}=0, d_{jk_{k \neq j}}=1*0 \right] - \left[ \hat{c}_i | d_j=0, d_{k_{k \neq j}}=0, d_{kl_{k,l \neq j}}=0, d_{jk_{k \neq j}}=0*0 \right] \quad (1)$$

with:

$\widehat{cost}_{id_j}$ : cost in 2014 associated with chronic disease  $j$  in strata  $i$  (no other comorbidity)

$\hat{c}_i$ : predicted outcome in strata  $i$

$d_i$ : binary chronic disease variable for disease  $i$

$d_{jk}$ : interaction variable between chronic disease variables  $d_j$  and  $d_j$

In the presence of a comorbidity, the cost associated with chronic disease  $d_j$  (with disease  $d_k$  as only comorbidity) is estimated as follows:

$$\widehat{cost}_{id_j|d_k} = \left[ \hat{c}_i | d_j=1, d_k=1, d_{l_{l \neq \{j,k\}}} = 0, d_{jk}=1*1, d_{jl_{l \neq \{j,k\}}} = 1*0, d_{kl_{l \neq \{j,k\}}} = 1*0, d_{lm_{l,m \neq \{j,k\}}} = 0*0 \right] - \left[ \hat{c}_i | d_j=0, d_k=1, d_{l_{l \neq \{j,k\}}} = 0, d_{jk}=0*1, d_{jl_{l \neq \{j,k\}}} = 0*0, d_{kl_{l \neq \{j,k\}}} = 1*0, d_{lm_{l,m \neq \{j,k\}}} = 0*0 \right] \quad (1 \text{ bis})$$

We obtained an average cost per capita attributable to each chronic disease by calculating a weighted mean over all strata:

$$\overline{\widehat{cost}_{d_j}} = \frac{1}{N} \sum_{i=1}^N w_i * \widehat{cost}_{id_j} \quad (2)$$

$$\overline{\widehat{cost}_{d_j|d_k}} = \frac{1}{N} \sum_{i=1}^N w_i * \widehat{cost}_{id_j|d_k} \quad (2 \text{ bis})$$

with:

$\overline{\widehat{cost}_{d_j}}$ : COI calculation for disease  $d_j$  (no comorbidity)

$\overline{\widehat{cost}_{d_j|d_k}}$ : COI calculation for disease  $d_j$  (among persons with disease  $d_k$  as comorbidity)

$N$ : total number of strata (=combination of gender, age groups)

$w_i$ : weight for stratum  $i$  (=number of individuals in the sample of persons with at least one disease)
